# Supplementary material for: Home-based health management needs of children with type 1 diabetes mellitus in China: an information platform-based qualitative study
Source: PubMed Central journal article supplement — Transl Pediatr. 2020 Aug;9(4):532–40. doi: 10.21037/tp-20-118 (PMC7475315; doi:10.21037/tp-20-118), 2020-08
Supplement: tp-09-04-532-dss.pdf [file tp-09-04-532-dss.pdf]

## Data Sharing Statement

|                               |                                                                                         |                                                                                                      |
|-------------------------------|-----------------------------------------------------------------------------------------|------------------------------------------------------------------------------------------------------|
| <b>Article information</b>    | <a href="http://dx.doi.org/10.21037/tp-20-118">http://dx.doi.org/10.21037/tp-20-118</a> |                                                                                                      |
| <b>Section</b>                | <b>Question</b>                                                                         | <b>Authors' Response<br/>(place "-" if not applicable)</b>                                           |
| Data collected for your study | Will the data collected for your study be made available to others?                     | The data during the current study are available from the corresponding author on reasonable request. |
|                               | If not, would you like to share the reason for your decision??                          | -                                                                                                    |
|                               | What data in particular will be shared?                                                 | Data from Wechat platform.                                                                           |
|                               | Any additional information about data?                                                  | No.                                                                                                  |
|                               | How or where can the data be obtained?                                                  | Please contact the corresponding author by email.                                                    |
|                               | When will data availability begin?                                                      | After the manuscript published.                                                                      |
|                               | When will data availability end?                                                        | -                                                                                                    |
| Supporting documents          | Will any supporting documents be available?                                             | -                                                                                                    |
|                               | Which supporting documents?                                                             | -                                                                                                    |
|                               | Any additional information about supporting documents?                                  | -                                                                                                    |
|                               | How or where can supporting documents be obtained?                                      | -                                                                                                    |
|                               | When will supporting documents availability begin?                                      | -                                                                                                    |
|                               | When will supporting documents availability end?                                        | -                                                                                                    |
| Restrictions                  | To whom will data be available?                                                         | Readers.                                                                                             |
|                               | For what type of analysis or purpose?                                                   | Reader who plan to conduct a research together.                                                      |
|                               | By what mechanism?                                                                      | Request by email.                                                                                    |
|                               | Any other restrictions?                                                                 | -                                                                                                    |
| Additional information        |                                                                                         | -                                                                                                    |
